# Supplementary material for: The efficacy of integrated hepatitis C virus treatment in relieving fatigue in people who inject drugs: a randomized controlled trial
Source: Springer Nature journal article supplement (doi:10.1186/s13011-023-00534-1), 2023-04-24
Supplement: MOESM1 [file 25276332]

## Additional File 1

Several guideline documents on HCV treatment in Norway have been relevant in the period 2017–2019. The following sources are some of the key documents in choice of treatment (most are in Norwegian and some of these have restricted access):

Guidelines from the Norwegian association for infectious diseases, version 7 (2017):

<https://www.hepatittfag.no/pdf-hcv>

Version 8 (2019):

<https://www.legeforeningen.no/contentassets/7bdf07c45b95411aa3c66e27822da583/veiledersveilederrevi-sjon-8-1.pdf>

The treatment choice guidelines from the health authorities:

Period 01.03.2016–28.02.2017: [http://innsiden.helse-](http://innsiden.helse-bergen.no/komiteer/legemiddelkomiteen/_layouts/WopiFrame.aspx?sourcedoc=/komiteer/legemiddelkomiteen/Dokumentbibliotek%20lager/Informasjon%20om%20LIS-anbud/2016/LIS-anbefalinger%20Hepatitt%20C%202016%20-%20HBe.docx&action=default&Source=http%3A%2F%2Finnsiden%2Ehelse%2Dbbergen%2EEno%2Fkomiteer%2Flegemiddelkomiteen%2FDokumentbibliotek%2520lager%2FForms%2FAllItems%2Easpx%3FRootFolder%3D%252Fkomiteer%252Flegemiddelkomiteen%252FDokumentbibliotek%2520lager%252FInformasjon%2520om%2520LIS%252Danbud%252F2016%26FolderCTID%3D0x012000872941027523124591CBCF04418E246C%26View%3D%7B4E86623D%2D3B87%2D484B%2DA087%2D07D7BB213411%7D&DefaultItemOpen=1)

[bergen.no/komiteer/legemiddelkomiteen/\\_layouts/WopiFrame.aspx?sourcedoc=/komiteer/legemiddelkomiteen/Dokumentbibliotek%20lager/Informasjon%20om%20LIS-anbud/2016/LIS-anbefalinger%20Hepatitt%20C%202016%20-%20HBe.docx&action=default&Source=http%3A%2F%2Finnsiden%2Ehelse%2Dbbergen%2EEno%2Fkomiteer%2Flegemiddelkomiteen%2FDokumentbibliotek%2520lager%2FForms%2FAllItems%2Easpx%3FRootFolder%3D%252Fkomiteer%252Flegemiddelkomiteen%252FDokumentbibliotek%2520lager%252FInformasjon%2520om%2520LIS%252Danbud%252F2016%26FolderCTID%3D0x012000872941027523124591CBCF04418E246C%26View%3D%7B4E86623D%2D3B87%2D484B%2DA087%2D07D7BB213411%7D&DefaultItemOpen=1](http://innsiden.helse-bergen.no/komiteer/legemiddelkomiteen/_layouts/WopiFrame.aspx?sourcedoc=/komiteer/legemiddelkomiteen/Dokumentbibliotek%20lager/Informasjon%20om%20LIS-anbud/2016/LIS-anbefalinger%20Hepatitt%20C%202016%20-%20HBe.docx&action=default&Source=http%3A%2F%2Finnsiden%2Ehelse%2Dbbergen%2EEno%2Fkomiteer%2Flegemiddelkomiteen%2FDokumentbibliotek%2520lager%2FForms%2FAllItems%2Easpx%3FRootFolder%3D%252Fkomiteer%252Flegemiddelkomiteen%252FDokumentbibliotek%2520lager%252FInformasjon%2520om%2520LIS%252Danbud%252F2016%26FolderCTID%3D0x012000872941027523124591CBCF04418E246C%26View%3D%7B4E86623D%2D3B87%2D484B%2DA087%2D07D7BB213411%7D&DefaultItemOpen=1)

Period 01.03.2017–28.02.2018: [http://innsiden.helse-](http://innsiden.helse-bergen.no/komiteer/legemiddelkomiteen/_layouts/WopiFrame.aspx?sourcedoc=/komiteer/legemiddelkomiteen/Dokumentbibliotek%20lager/Helseforetakens%20LIS%20HCV%20anbefalinger%202017%20-%20reviderte%20130617.pdf&action=default&Source=http%3A%2F%2Finnsiden%2Ehelse%2Dbbergen%2EEno%2Fkomiteer%2Flegemiddelkomiteen%2FDokumentbibliotek%2520lager%2FForms%2FAllItems%2Easpx&DefaultItemOpen=1)

[bergen.no/komiteer/legemiddelkomiteen/\\_layouts/WopiFrame.aspx?sourcedoc=/komiteer/legemiddelkomiteen/Dokumentbibliotek%20lager/Helseforetakens%20LIS%20HCV%20anbefalinger%202017%20-%20reviderte%20130617.pdf&action=default&Source=http%3A%2F%2Finnsiden%2Ehelse%2Dbbergen%2EEno%2Fkomiteer%2Flegemiddelkomiteen%2FDokumentbibliotek%2520lager%2FForms%2FAllItems%2Easpx&DefaultItemOpen=1](http://innsiden.helse-bergen.no/komiteer/legemiddelkomiteen/_layouts/WopiFrame.aspx?sourcedoc=/komiteer/legemiddelkomiteen/Dokumentbibliotek%20lager/Helseforetakens%20LIS%20HCV%20anbefalinger%202017%20-%20reviderte%20130617.pdf&action=default&Source=http%3A%2F%2Finnsiden%2Ehelse%2Dbbergen%2EEno%2Fkomiteer%2Flegemiddelkomiteen%2FDokumentbibliotek%2520lager%2FForms%2FAllItems%2Easpx&DefaultItemOpen=1)

Period 01.02.2018–31.01.2019: [http://innsiden.helse-](http://innsiden.helse-bergen.no/komiteer/legemiddelkomiteen/_layouts/WopiFrame2.aspx?sourcedoc=/komiteer/legemiddelkomiteen/Dokumentbibliotek%20lager/Informasjon%20om%20LIS-anbud/2018/LIS%20HCV%20anbefalinger%202018.pdf&action=default&Source=http%3A%2F%2Finnsiden%2Ehelse%2Dbbergen%2EEno%2Fkomiteer%2Flegemiddelkomiteen%2FDokumentbibliotek%2520lager%2FForms%2FAllItems%2Easpx%3FRootFolder%3D%252Fkomiteer%252Flegemiddelkomiteen%252FDokumentbibliotek%2520lager%252FInformasjon%2520om%2520LIS%252Danbud%252F2018%26FolderCTID%3D0x012000872941027523124591CBCF04418E246C%26View%3D%7B4E86623D%2D3B87%2D484B%2DA087%2D07D7BB213411%7D&DefaultItemOpen=1&DefaultItemOpen=1)

[bergen.no/komiteer/legemiddelkomiteen/\\_layouts/WopiFrame2.aspx?sourcedoc=/komiteer/legemiddelkomiteen/Dokumentbibliotek%20lager/Informasjon%20om%20LIS-anbud/2018/LIS%20HCV%20anbefalinger%202018.pdf&action=default&Source=http%3A%2F%2Finnsiden%2Ehelse%2Dbbergen%2EEno%2Fkomiteer%2Flegemiddelkomiteen%2FDokumentbibliotek%2520lager%2FForms%2FAllItems%2Easpx%3FRootFolder%3D%252Fkomiteer%252Flegemiddelkomiteen%252FDokumentbibliotek%2520lager%252FInformasjon%2520om%2520LIS%252Danbud%252F2018%26FolderCTID%3D0x012000872941027523124591CBCF04418E246C%26View%3D%7B4E86623D%2D3B87%2D484B%2DA087%2D07D7BB213411%7D&DefaultItemOpen=1&DefaultItemOpen=1](http://innsiden.helse-bergen.no/komiteer/legemiddelkomiteen/_layouts/WopiFrame2.aspx?sourcedoc=/komiteer/legemiddelkomiteen/Dokumentbibliotek%20lager/Informasjon%20om%20LIS-anbud/2018/LIS%20HCV%20anbefalinger%202018.pdf&action=default&Source=http%3A%2F%2Finnsiden%2Ehelse%2Dbbergen%2EEno%2Fkomiteer%2Flegemiddelkomiteen%2FDokumentbibliotek%2520lager%2FForms%2FAllItems%2Easpx%3FRootFolder%3D%252Fkomiteer%252Flegemiddelkomiteen%252FDokumentbibliotek%2520lager%252FInformasjon%2520om%2520LIS%252Danbud%252F2018%26FolderCTID%3D0x012000872941027523124591CBCF04418E246C%26View%3D%7B4E86623D%2D3B87%2D484B%2DA087%2D07D7BB213411%7D&DefaultItemOpen=1&DefaultItemOpen=1)

Period 01.02.2019–31.01.2021: <https://sykehusinnkjop.no/seksjon/avtaler-legemidler/Documents/Hepatitt%20B%20og%20C/Anbefaling%20LIS%201908%20hepatitt%20C.pdf>
