# Supplementary material for: The efficacy of integrated hepatitis C virus treatment in relieving fatigue in people who inject drugs: a randomized controlled trial
Source: Springer Nature journal article supplement (doi:10.1186/s13011-023-00534-1), 2023-04-24
Supplement: MOESM2 [file 25276332]

## Additional File 2

- 
- I1: My motivation is lower when I am fatigued
  - I2: Exercise brings on my fatigue
  - I3: I am easily fatigued
  - I4: Fatigue interferes with my physical functioning
  - I5: Fatigue causes frequent problems for me
  - I6: My fatigue prevents sustained physical functioning
  - I7: Fatigue interferes with carrying out certain duties and responsibilities
  - I8: Fatigue is among my three most disabling symptoms
  - I9: Fatigue interferes with my work, family, or social life
- 

- 
- I1: Mitt pågangsmot blir dårligere når jeg er utmattet
  - I2: Jeg blir fort utmattet ved anstrengelser
  - I3: Jeg har lett for å bli utmattet
  - I4: Utmattelse nedsetter min fysiske funksjonsevne
  - I5: Utmattelse skaper ofte problemer for meg
  - I6: Utmattelse fører til at jeg har dårlig fysisk utholdenhet over lengre tid
  - I7: Utmattelse virker negativt inn på mine gjøremål og forpliktelser
  - I8: Utmattelse er ett av mine tre mest plagsomme symptomer
  - I9: Utmattelse virker negativt inn på mitt arbeid, min familie og mitt øvrige sosiale liv
-
