# Supplementary material for: The efficacy of integrated hepatitis C virus treatment in relieving fatigue in people who inject drugs: a randomized controlled trial
Source: Springer Nature journal article supplement (doi:10.1186/s13011-023-00534-1), 2023-04-24
Supplement: MOESM3 [file 25276332]

**Additional File 3**

$$APRI = \frac{\frac{AST \text{ level } (\frac{IU}{L})}{AST \text{ (Upper limit of Normal) } (\frac{IU}{L})}}{\frac{Platelet \text{ Count } (\frac{10^9}{L})}{100}} \times 100$$
