# Supplementary material for: The efficacy of integrated hepatitis C virus treatment in relieving fatigue in people who inject drugs: a randomized controlled trial
Source: Springer Nature journal article supplement (doi:10.1186/s13011-023-00534-1), 2023-04-24
Supplement: MOESM5 [file 25276332]

**Additional File 5**

|                                              | <i>Mean score<br/>of all items (SD)</i> | <i>Sum score<br/>of all items (SD)</i> |
|----------------------------------------------|-----------------------------------------|----------------------------------------|
| <i>Intention-to-treat analyses</i>           |                                         |                                        |
| Integrated HCV treatment, baseline (N = 141) | 5.1 (1.6)                               | 46 (15)                                |
| Standard HCV treatment, baseline (N = 135)   | 4.6 (1.8)                               | 41 (16)                                |
| Integrated HCV treatment, EOT12 (N = 141)    | 4.7 (1.6)                               | 42 (15)                                |
| Standard HCV treatment, EOT12 (N = 135)      | 4.5 (1.6)                               | 40 (14)                                |
| <i>Per-protocol analyses</i>                 |                                         |                                        |
| Integrated HCV treatment, baseline (N = 116) | 5.1 (1.6)                               | 46 (15)                                |
| Standard HCV treatment, baseline (N = 96)    | 4.6 (1.8)                               | 41 (16)                                |
| Integrated HCV treatment, EOT12 (N = 116)    | 4.7 (1.6)                               | 43 (15)                                |
| Standard HCV treatment, EOT12 (N = 96)       | 4.4 (1.7)                               | 39 (15)                                |
