# Supplementary material for: The efficacy of integrated hepatitis C virus treatment in relieving fatigue in people who inject drugs: a randomized controlled trial
Source: Springer Nature journal article supplement (doi:10.1186/s13011-023-00534-1), 2023-04-24
Supplement: MOESM6 [file 25276332]

## Additional File 6

|                                                | Effect estimates      |                 |
|------------------------------------------------|-----------------------|-----------------|
|                                                | Coefficient (95 % CI) | <i>p</i> -value |
| Time trend                                     | -0.8 (-5.1;3.4)       | 0.700           |
| <i>ΔFSS-9 sum score from baseline to EOT12</i> |                       |                 |
| Standard HCV treatment                         | 0.0 (ref.)            | -               |
| Integrated HCV treatment                       | -1.0 (-5.0;3.0)       | 0.633           |
| Achieving SVR                                  | -1.2 (-5.4;3.0)       | 0.573           |
