# Supplementary material for: The efficacy of integrated hepatitis C virus treatment in relieving fatigue in people who inject drugs: a randomized controlled trial
Source: Springer Nature journal article supplement (doi:10.1186/s13011-023-00534-1), 2023-04-24

Additional File 8

### Integrated HCV treatment

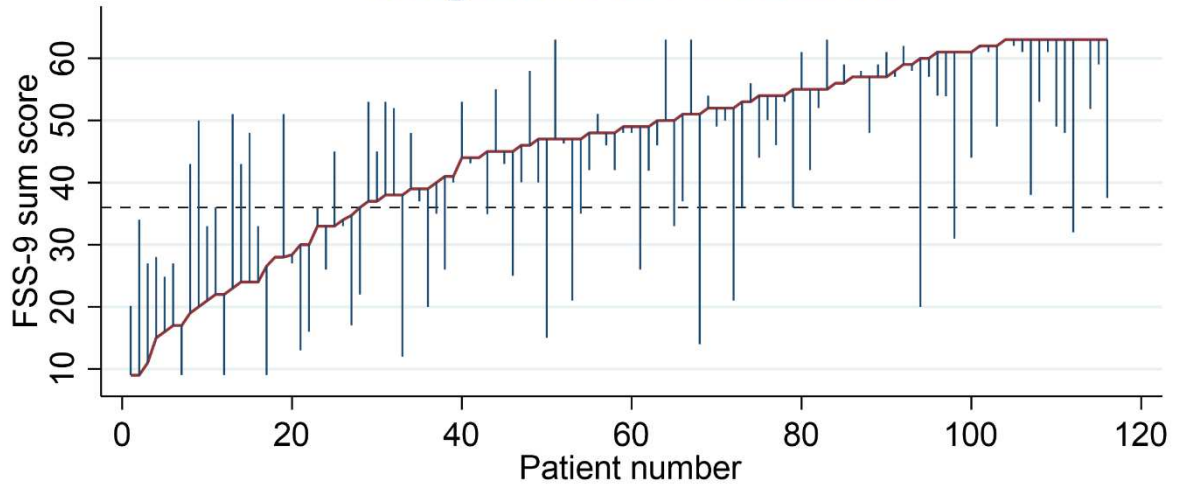

### Standard HCV treatment

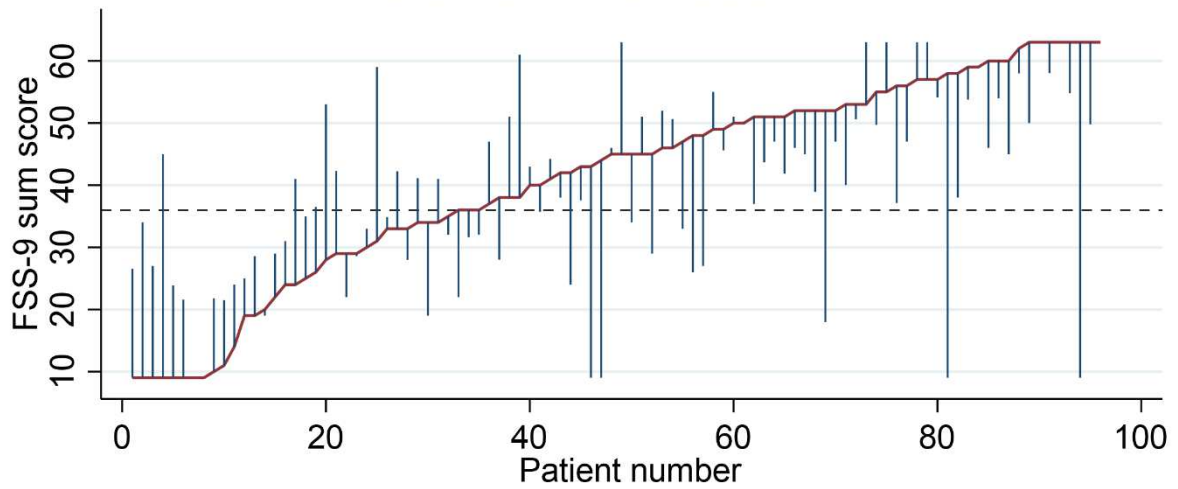

Supplement: MOESM8 [file 25276332]
