# Supplementary material for: The efficacy of integrated hepatitis C virus treatment in relieving fatigue in people who inject drugs: a randomized controlled trial
Source: Springer Nature journal article supplement (doi:10.1186/s13011-023-00534-1), 2023-04-24
Supplement: MOESM9 [file 25276332]

## Additional File 9

|                                                | Effect estimates      |                 |
|------------------------------------------------|-----------------------|-----------------|
|                                                | Coefficient (95 % CI) | <i>p</i> -value |
| Time trend                                     | 0.1 (-5.3;5.5)        | 0.969           |
| <i>ΔFSS-9 sum score from baseline to EOT12</i> |                       |                 |
| Standard HCV treatment                         | 0.0 (ref.)            | -               |
| Integrated HCV treatment                       | -2.4 (-7.0;2.3)       | 0.313           |
| Achieving SVR                                  | -1.6 (-6.5;3.8)       | 0.603           |
