# Supplementary material for: The efficacy of integrated hepatitis C virus treatment in relieving fatigue in people who inject drugs: a randomized controlled trial
Source: Springer Nature journal article supplement (doi:10.1186/s13011-023-00534-1), 2023-04-24
Supplement: MOESM10 [file 25276332]

## Additional File 10

|                                                | Effect estimates      |                 |
|------------------------------------------------|-----------------------|-----------------|
|                                                | Coefficient (95 % CI) | <i>p</i> -value |
| Time trend                                     | 3.7 (−3.8;11.2)       | 0.330           |
| <i>ΔFSS-9 sum score from baseline to EOT12</i> |                       |                 |
| Standard HCV treatment                         | 0.0 (ref.)            | -               |
| Integrated HCV treatment                       | 0.9 (−4.1;6.0)        | 0.715           |
| Achieving SVR                                  | −7.4 (−14.6; −0.2)    | 0.044           |
