# Supplementary material for: The efficacy of integrated hepatitis C virus treatment in relieving fatigue in people who inject drugs: a randomized controlled trial
Source: Springer Nature journal article supplement (doi:10.1186/s13011-023-00534-1), 2023-04-24
Supplement: MOESM11 [file 25276332]

## Additional File 11

|                                       | Baseline                 |                 | Time trends<br>(from baseline to EOT12) |                 |
|---------------------------------------|--------------------------|-----------------|-----------------------------------------|-----------------|
|                                       | Coefficient<br>(95 % CI) | <i>p</i> -value | Coefficient<br>(95 % CI)                | <i>p</i> -value |
| Time (from baseline to EOT12)         | -                        | -               | 5.1 (-4.2;14.4)                         | 0.281           |
| <i>Sex</i>                            |                          |                 |                                         |                 |
| Female                                | 4.2 (-5.1;13.5)          | 0.374           | 2.0 (-2.1;6.1)                          | 0.340           |
| <i>Age groups</i>                     |                          |                 |                                         |                 |
| 18-<30                                | 0.0 (ref.)               |                 | 0.0 (ref.)                              |                 |
| 30-<40                                | 1.1 (-5.0;7.2)           | 0.721           | -5.8 (-11.9;0.2)                        | 0.060           |
| 40-<50                                | 3.9 (-2.3;10.0)          | 0.219           | -7.4 (-13.5;-1.3)                       | 0.019           |
| 50-<60                                | -1.4 (-7.9;5.0)          | 0.667           | -4.2 (-10.7;2.2)                        | 0.197           |
| ≥ 60                                  | 5.8 (-4.1;15.8)          | 0.247           | -7.7 (-17.6;2.2)                        | 0.129           |
| <i>Educational attainment</i>         |                          |                 |                                         |                 |
| Not completed primary school          | 0.0 (ref.)               |                 | 0.0 (ref.)                              |                 |
| Primary school (9 years)              | -3.2 (-10.3;3.8)         | 0.370           | -0.1 (-7.1;6.9)                         | 0.983           |
| High school (12 years)                | -7.5 (-14.7;-0.3)        | 0.040           | 0.6 (-6.5;7.8)                          | 0.860           |
| ≤ 3 years of college or university    | -5.9 (-14.7;3.5)         | 0.227           | 4.5 (-4.5;13.5)                         | 0.321           |
| > 3 years of college or university    | -7.9 (-22.2;6.3)         | 0.276           | -3.5 (-17.8;10.7)                       | 0.626           |
| <i>Injecting drug use</i>             |                          |                 |                                         |                 |
| Injecting drug use                    | 2.3 (-1.6;6.2)           | 0.240           | -3.7 (-7.6;0.2)                         | 0.062           |
| <i>Frequent drug use</i>              |                          |                 |                                         |                 |
| Alcohol                               | 0.5 (-3.6;4.5)           | 0.889           | -1.0 (-5.0;3.0)                         | 0.613           |
| Benzodiazepines                       | 4.1 (0.3;7.9)            | 0.036           | 0.8 (-3.0;4.5)                          | 0.687           |
| Cannabis                              | -0.5 (-4.1;3.1)          | 0.792           | 3.5 (-0.1;7.1)                          | 0.059           |
| Opioids                               | 2.7 (-2.9;8.4)           | 0.338           | -1.8 (-7.4;3.7)                         | 0.519           |
| Stimulants (amphetamines and cocaine) | -6.0 (-9.7;-1.5)         | 0.008           | -2.6 (-6.7;1.5)                         | 0.211           |
| Achieved SVR                          | -                        | -               | -1.1 (-4.7;2.4)                         | 0.523           |
