# Supplementary material for: The efficacy of integrated hepatitis C virus treatment in relieving fatigue in people who inject drugs: a randomized controlled trial
Source: Springer Nature journal article supplement (doi:10.1186/s13011-023-00534-1), 2023-04-24
Supplement: MOESM12 [file 25276332]

## Additional File 12

|                                       | Baseline                 |                 | Time trends<br>(from baseline to EOT12) |                 |
|---------------------------------------|--------------------------|-----------------|-----------------------------------------|-----------------|
|                                       | Coefficient<br>(95 % CI) | <i>p</i> -value | Coefficient<br>(95 % CI)                | <i>p</i> -value |
| Time (from baseline to EOT12)         | -                        | -               | 0.0 (-11.5;11.6)                        | 0.997           |
| <i>Sex</i>                            |                          |                 |                                         |                 |
| Female                                | 5.1 (0.3;9.9)            | 0.039           | 1.4 (-3.5;6.2)                          | 0.575           |
| <i>Age groups</i>                     |                          |                 |                                         |                 |
| 18-<30                                | 0.0 (ref.)               |                 | 0.0 (ref.)                              |                 |
| 30-<40                                | 2.1 (-4.8;9.1)           | 0.548           | -6.1 (-13.0;1.0)                        | 0.090           |
| 40-<50                                | 4.4 (-2.8;11.5)          | 0.230           | -6.9 (-14.1;0.3)                        | 0.060           |
| 50-<60                                | 0.4 (-7.1;7.9)           | 0.917           | -3.5 (-11.1;4.1)                        | 0.366           |
| ≥ 60                                  | 10.5 (-0.5;21.4)         | 0.061           | -10.1 (-21.1;1.0)                       | 0.072           |
| <i>Educational attainment</i>         |                          |                 |                                         |                 |
| Not completed primary school          | 0.0 (ref.)               |                 | 0.0 (ref.)                              |                 |
| Primary school (9 years)              | -6.5 (-15.0;2.1)         | 0.138           | 3.8 (-4.8;12.4)                         | 0.384           |
| High school (12 years)                | -12.1 (-20.8;-3.4)       | 0.007           | 4.8 (-4.0;13.5)                         | 0.283           |
| ≤ 3 years of college or university    | -11.7 (-22.7;-0.8)       | 0.035           | 11.7 (0.8;22.6)                         | 0.036           |
| > 3 years of college or university    | -15.5 (-34.2;3.2)        | 0.103           | 2.7 (-16.0;21.5)                        | 0.773           |
| Injecting drug use                    | 1.5 (-3.0;6.0)           | 0.504           | -2.4 (-7.0;2.2)                         | 0.310           |
| <i>Frequent drug use</i>              |                          |                 |                                         |                 |
| Alcohol                               | -0.5 (-5.4;4.4)          | 0.844           | -1.4 (-6.3;3.5)                         | 0.582           |
| Benzodiazepines                       | 3.5 (-1.0;7.9)           | 0.126           | -0.4 (-4.8;4.1)                         | 0.874           |
| Cannabis                              | 0.8 (-3.5;5.0)           | 0.728           | 2.7 (-1.6;7.0)                          | 0.222           |
| Opioids                               | 1.7 (-5.3;8.7)           | 0.637           | -2.9 (-10.0;4.1)                        | 0.414           |
| Stimulants (amphetamines and cocaine) | -6.2 (-10.9;-1.5)        | 0.010           | -1.6 (-6.3;3.1)                         | 0.499           |
| Achieved SVR                          | -                        | -               | -1.1 (-6.3;4.2)                         | 0.691           |
